# Supplementary material for: Uncoupled turnover disrupts mitochondrial quality control in diabetic retinopathy
Source: PubMed Central journal article supplement (PMC6962019; doi:10.1172/jci.insight.129760), 2019-12-05
Supplement: jciinsight-4-129760-s009.pdf [file jciinsight-4-129760-s009.pdf]

## **Uncoupled turnover disrupts mitochondrial quality control in diabetic retinopathy**

Jose R. Hombrebueno<sup>1,2#</sup>, Lauren Cairns<sup>1</sup>, Louise R. Dutton<sup>1</sup>, Timothy J. Lyons<sup>1,3</sup>, Derek P. Brazil<sup>1</sup>, Paul Moynagh<sup>1,4</sup>, Tim M. Curtis<sup>1</sup>, Heping Xu<sup>1</sup>

<sup>1</sup>Wellcome-Wolfson Institute for Experimental Medicine, School of Medicine, Dentistry and Biomedical Sciences, Queen's University Belfast, Belfast, UK.

<sup>2</sup>Institute of Inflammation and Ageing, University of Birmingham, Birmingham, UK

<sup>3</sup>Division of Endocrinology and Diabetes, Medical University of South Carolina, Charleston, SC, USA.

<sup>4</sup>Institute of Immunology, Department of Biology, National University of Ireland Maynooth, Maynooth, County Kildare, Ireland

#Correspondence to Dr Jose Romero Hombrebueno; [j.m.romero@bham.ac.uk](mailto:j.m.romero@bham.ac.uk)

Institute of Inflammation and Ageing, School of Medical and Dental Sciences, University of Birmingham, Edgbaston, Birmingham, B15 2TT, UK. Phone: +44 1213713226

The authors have declared that no conflict of interest exists

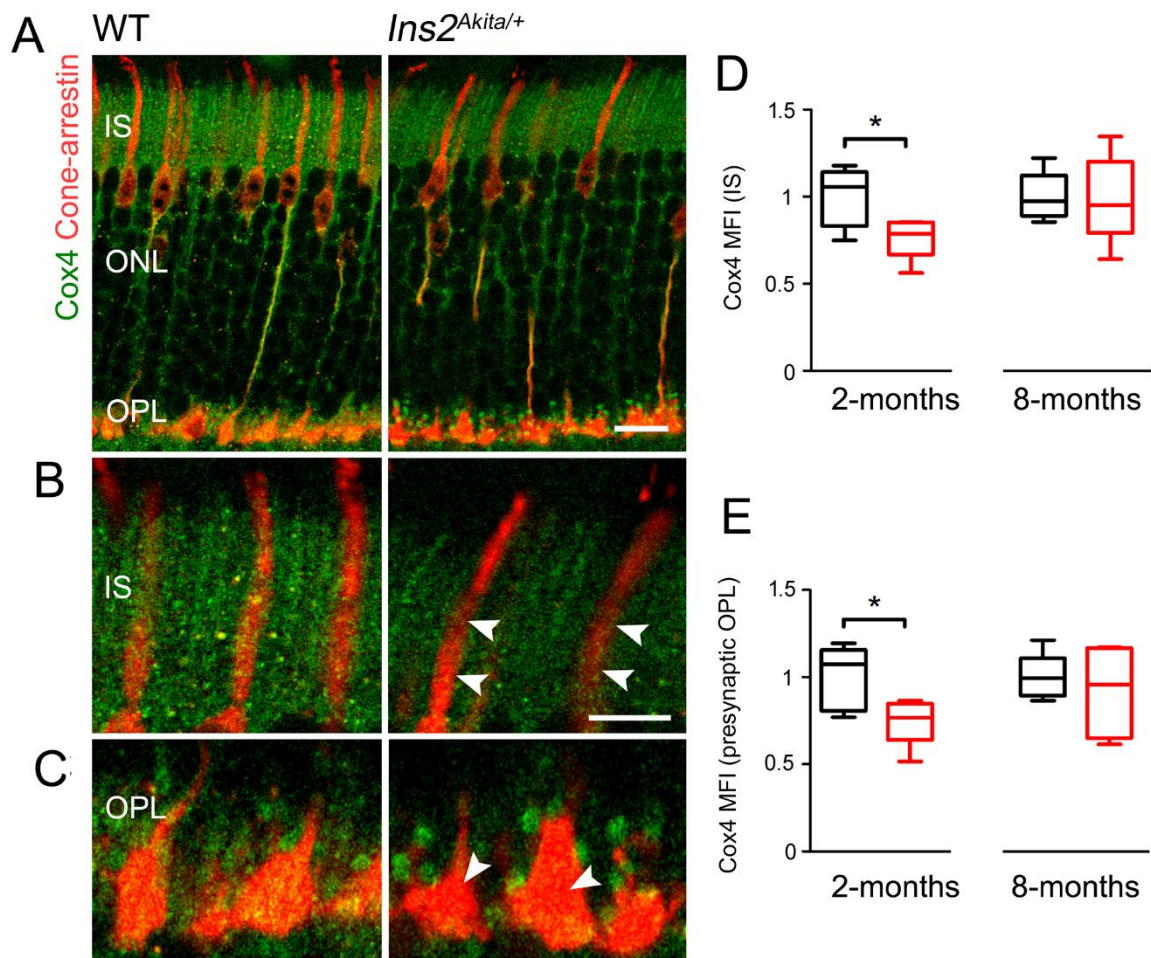

**Supplemental Fig 1. Photoreceptor mitochondrial contents change during the progression of diabetes in *Ins2<sup>Akita/+</sup>* retinas.** (A-C) Retinal micrographs of 2-month hyperglycaemic *Ins2<sup>Akita/+</sup>* and age-matched WT mice processed for Cox4 and cone-arrestin immunostaining. Arrowheads indicate loss of Cox4 within cone photoreceptors IS (B) and synaptic terminals of the OPL (C). (D-E) The mean fluorescence intensities (MFI) of Cox4 at the IS (D) and OPL (E) of 2-month and 8-month hyperglycaemic *Ins2<sup>Akita/+</sup>* and age-matched WT mice. Keys: WT (black plots), *Ins2<sup>Akita/+</sup>* (red plots). Data is presented in box-and-whisker plots; n=5 eyes per strain. Results presented as mean  $\pm$  SEM. \* $p < 0.05$ , two-sided unpaired Student's t-test. IS, photoreceptor inner segments; OPL, outer plexiform layer; ONL, outer nuclear layer. Scale bar = 20  $\mu$ m (A), 10 $\mu$ m (B).

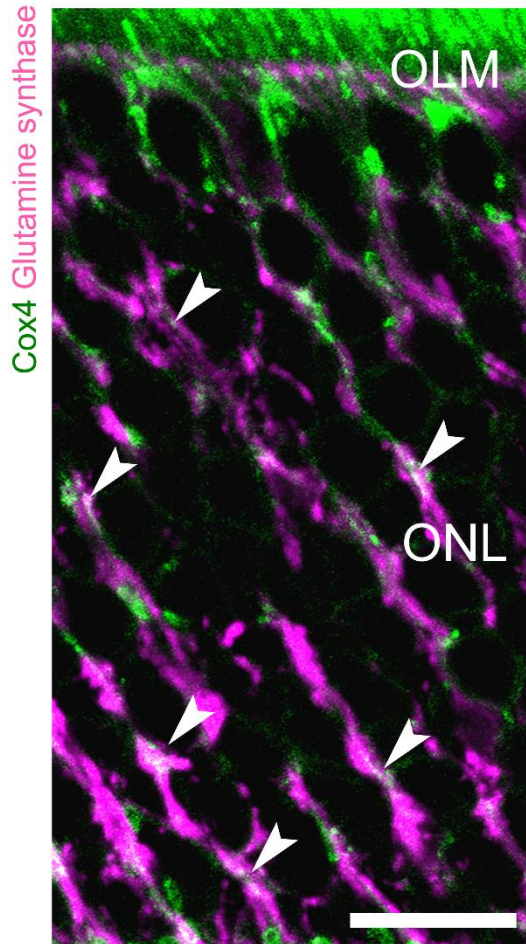

**Supplemental Fig 2. Müller cell processes contain high levels of mitochondria at the outer retina.** Retinal micrographs of 2-month WT mice processed for Cox4 and glutamine synthase (GS) immunostaining. The arrowheads indicate enrichment of Cox4<sup>+</sup> mitochondria within GS<sup>+</sup> Müller cell processes at the outer nuclear layer (ONL). OLM, outer limiting membrane. Scale bar = 20  $\mu$ m

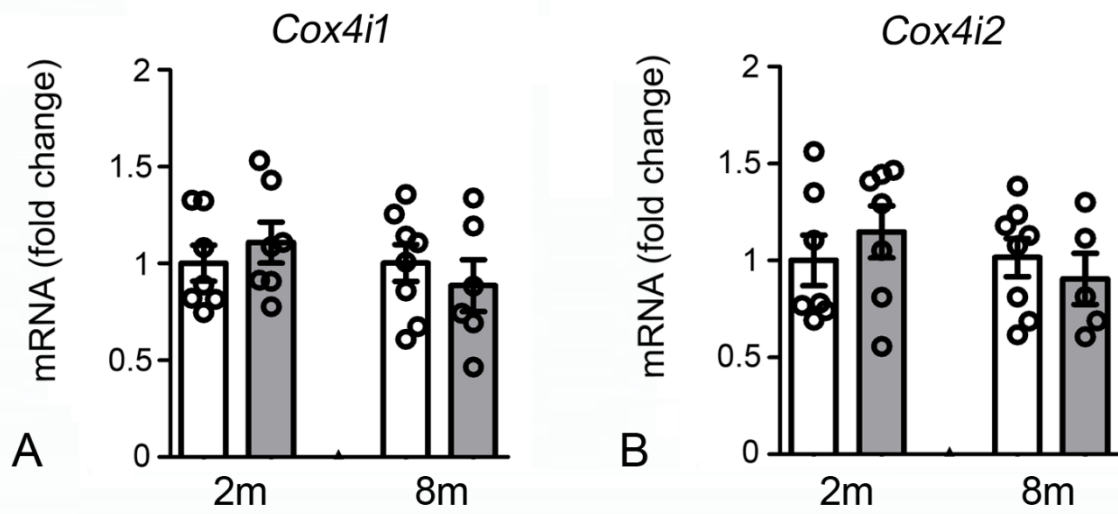

**Supplemental Fig 3. Cox4 mRNA levels in 2-month and 8-month hyperglycaemic *Ins2<sup>Akita/+</sup>* retinas.** rtPCR analysis of *Cox4i1* (A) and *Cox4i2* (B) isoforms in the retina of 2-month and 8-month hyperglycaemic *Ins2<sup>Akita/+</sup>* and age-matched WT mice. Keys: WT (white bars), *Ins2<sup>Akita/+</sup>* (grey bars); n=5-8 eyes per strain. Results are presented as mean  $\pm$  SEM. Two-sided unpaired Student's *t*-test.

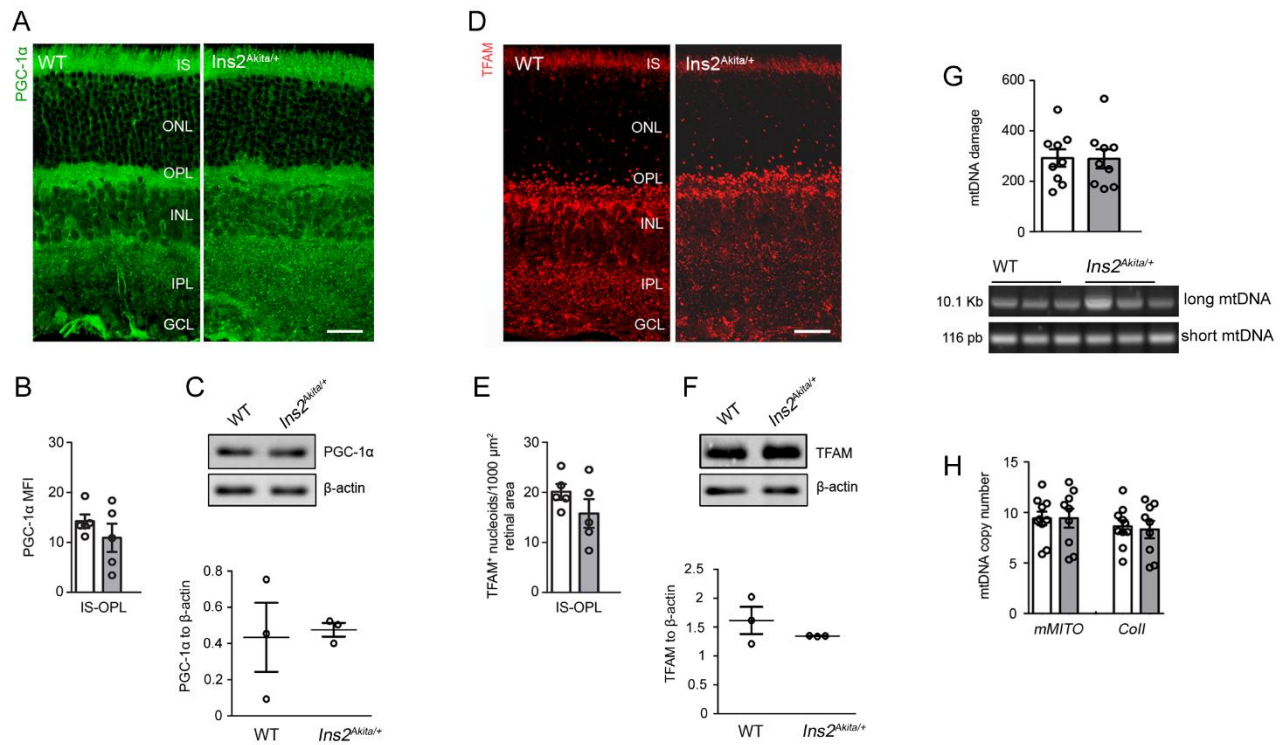

**Supplemental Fig 4. Mitochondrial biogenesis machinery in 2-month hyperglycaemic *Ins2<sup>Akita/+</sup>* mouse retinas.** (A) Retinal micrographs from 2-month hyperglycaemic *Ins2<sup>Akita/+</sup>* and aged-matched WT mice processed for PGC-1 $\alpha$  immunostaining. (B) The mean fluorescence intensity (MFI) of PGC-1 $\alpha$  at the IS-OPL. (C) Example immunoblot and quantification of PGC-1 $\alpha$  in mouse retinal lysates of 2-month hyperglycaemic *Ins2<sup>Akita/+</sup>* and age-matched WT. Data was normalized to  $\beta$ -actin loading controls. (D) Retinal micrographs from 2-month hyperglycaemic *Ins2<sup>Akita/+</sup>* and aged-matched WT mice processed for TFAM immunostaining. (E) The density of TFAM<sup>+</sup> mitochondrial nucleoids at the IS-OPL. (F) Example immunoblot and quantification of TFAM in mouse retinal lysates of 2-month hyperglycaemic *Ins2<sup>Akita/+</sup>* and age-matched WT. Data was normalized to  $\beta$ -actin loading controls. TFAM shared similar  $\beta$ -actin loading controls to those in Fig 2A (Cox4) (G) Evaluation of mtDNA damage in 2-month hyperglycaemic *Ins2<sup>Akita/+</sup>* and age-matched WT mouse retinas by amplification of long (10.1Kb) and short (116pb) mtDNA regions. A reduction in the long/short amplification ratio is indicative of mtDNA damage. (H) Mitochondrial copy numbers evaluated by qPCR analysis of *mMITO* and *CoII* mtDNA regions. Keys: WT (white bars), *Ins2<sup>Akita/+</sup>* (grey bars); n=3-10 eyes per strain. Results are presented as mean  $\pm$  SEM. Two-sided unpaired Student's *t*-test. IS, photoreceptor inner segments; ONL, outer nuclear layer; OPL, outer plexiform layer; INL, inner nuclear layer; IPL, inner plexiform layer; GCL, ganglion cell layer. Scale bars = 40  $\mu$ m.

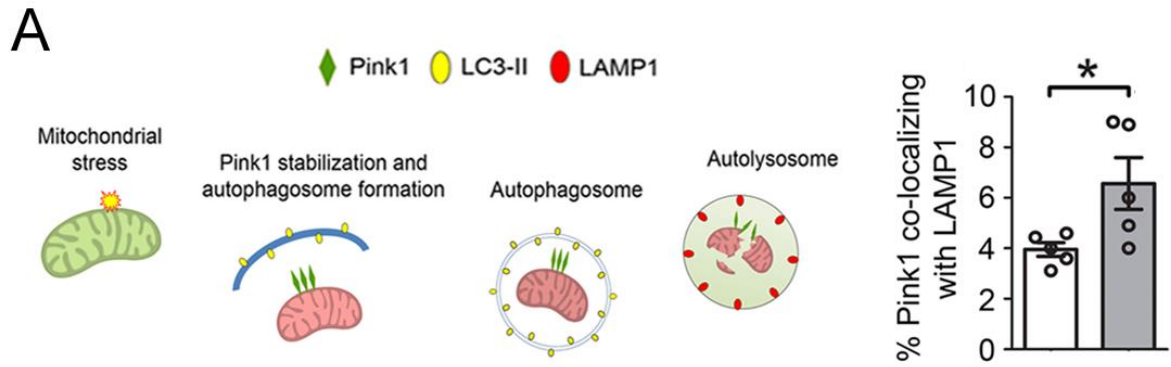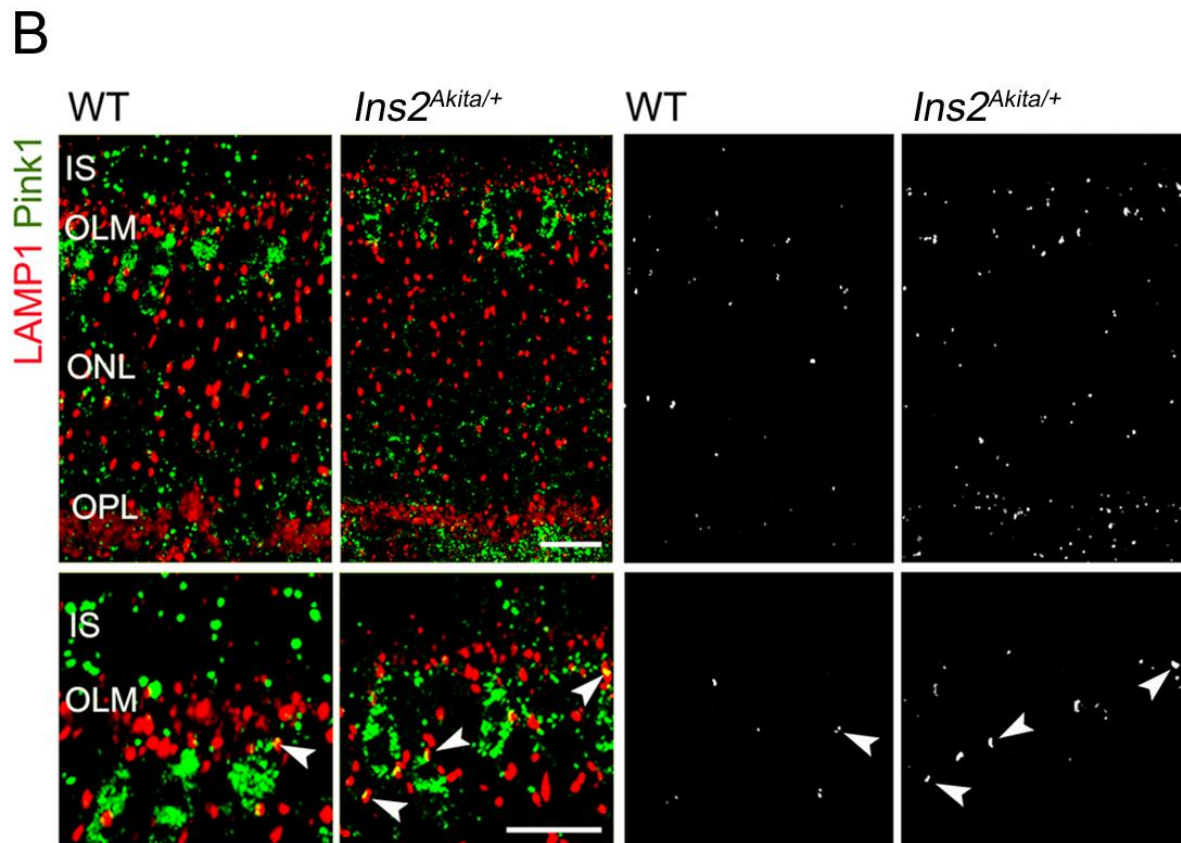

**Supplemental Fig 5. Elevated Pink1-mitophagy at the outer retina of 2-month hyperglycaemic *Ins2<sup>Akita/+</sup>* mice.** (A) The levels of Pink1 within lysosomes were assessed as an index of Pink1-dependent mitophagy in the retina of 2-month hyperglycaemic *Ins2<sup>Akita/+</sup>* and age-matched WT mice. (B) Confocal photomicrographs show Pink1-LAMP1 co-localizing particles (as highlighted by particle binarization) at the IS-OPL (arrowheads). Keys: WT (white bars), *Ins2<sup>Akita/+</sup>* (grey bars), n=5 eyes per strain. Results presented as mean ± SEM. \*p<0.05, two-sided unpaired Student's t-test. IS, photoreceptor inner segments; OLM, outer limiting membrane, ONL, outer nuclear layer; OPL, Scale bars = 20µm.

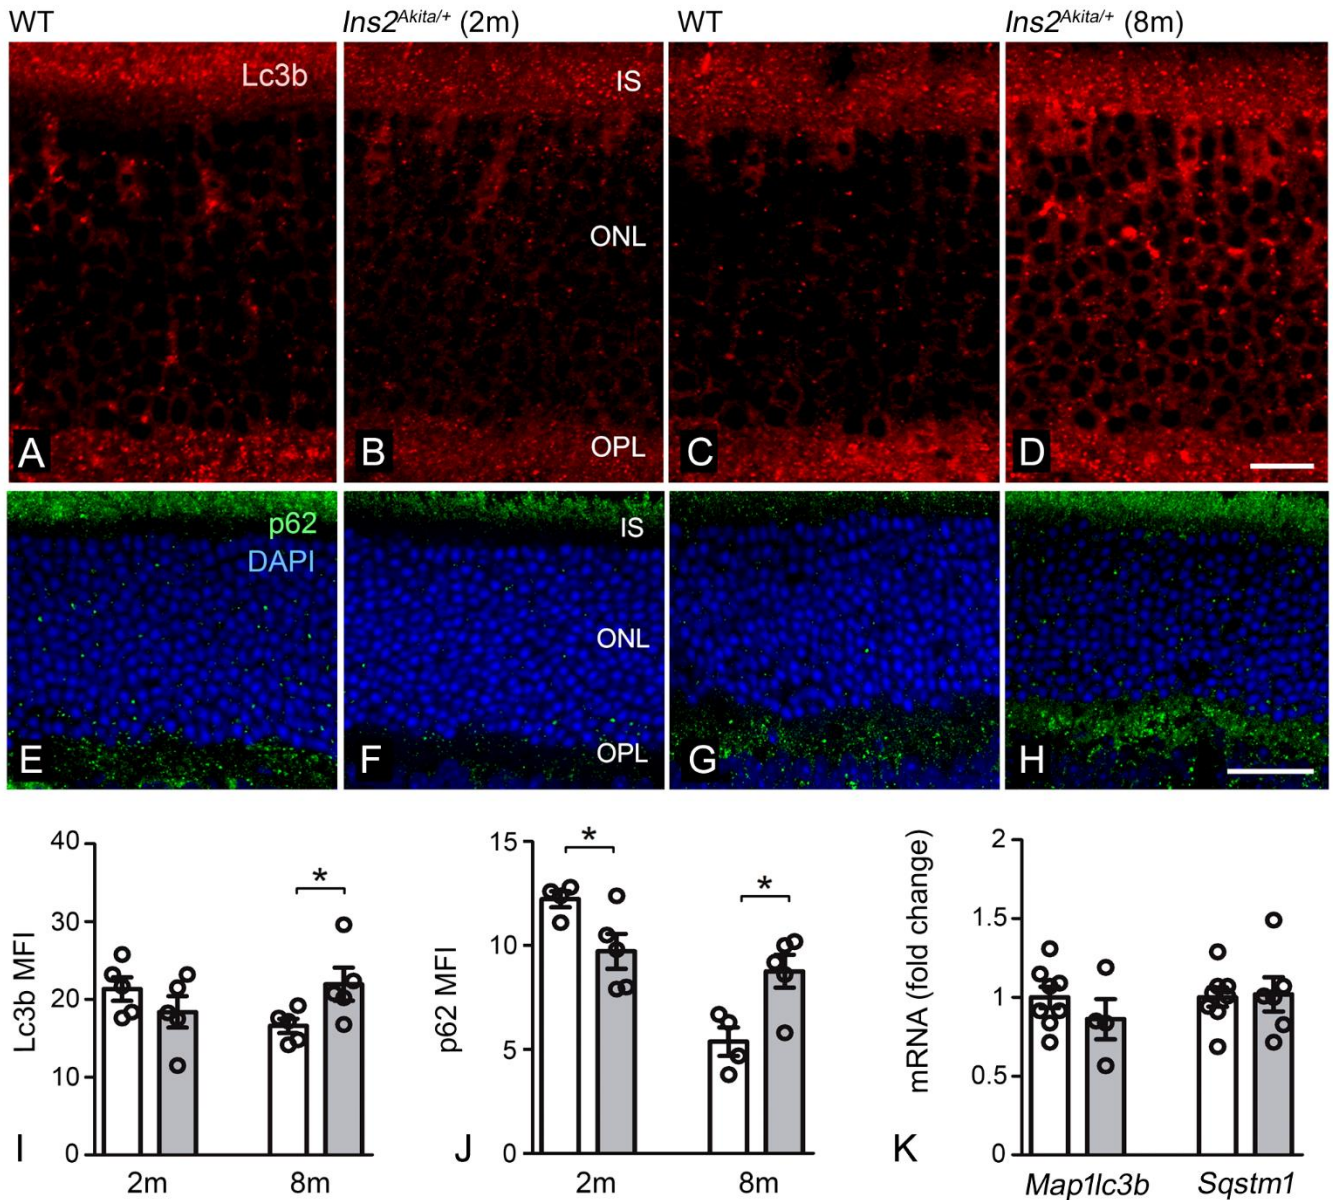

**Supplemental Fig 6. Autophagy adaptors accumulate during the progression of diabetes in *Ins2<sup>Akit+/+</sup>* retinas.** (A-H) Retinal micrographs of 2 and 8-month hyperglycaemic *Ins2<sup>Akit+/+</sup>* and aged-matched WT mice processed for Lc3b (A-D) and p62/SQSTM1 (E-H) immunoreactivities. The mean fluorescence intensities (MFI) of Lc3b (I) and p62/SQSTM1 (J) at the outer retina (IS-OPL) of 2-month and 8-month hyperglycaemic *Ins2<sup>Akit+/+</sup>* and aged-matched WT mice. rPCR analysis of *Map1lc3b* and *Sqstm1* gene transcripts in the retina of 8-month hyperglycaemic *Ins2<sup>Akit+/+</sup>* and age-matched WT mice. Keys (I-K): WT (white bars), *Ins2<sup>Akit+/+</sup>* (grey bars), n=4-8 eyes per strain. Results are presented as mean ± SEM. \* $p < 0.05$ . Two-sided unpaired Student's *t*-test. IS, photoreceptor inner segments; ONL, outer nuclear layer; OPL, outer plexiform layer. Scale bars = 10  $\mu$ m (D), 40  $\mu$ m (H).

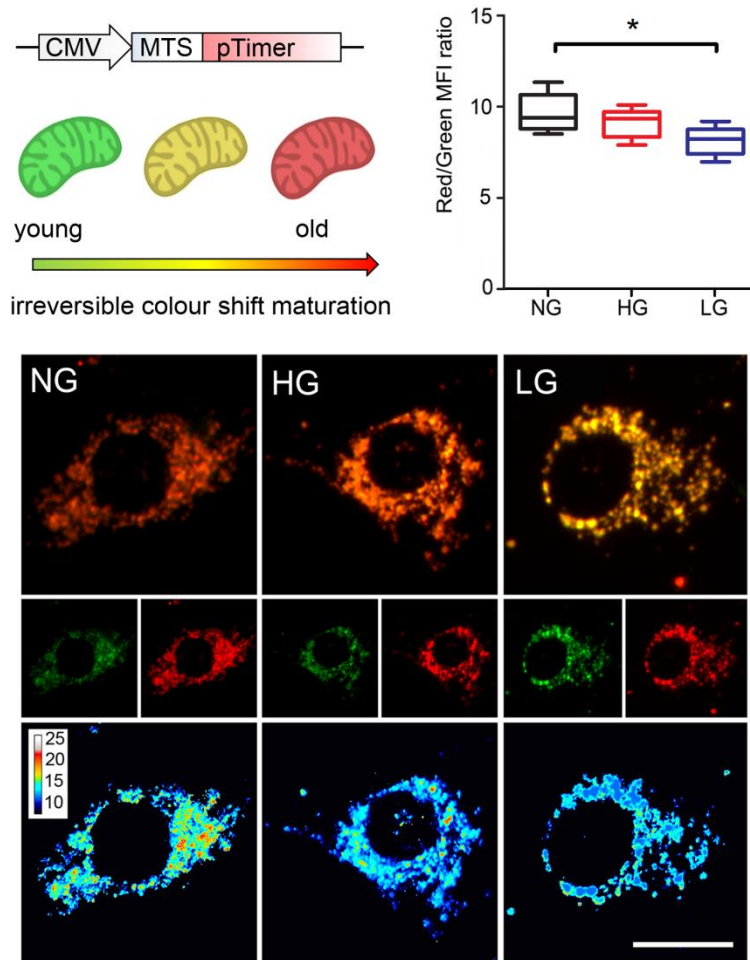

**Supplemental Fig 7. Evaluation of mitochondrial turnover in MIO-M1 cultures with *pMitoTimer*.** MIO-M1 cells were transfected with *pMitoTimer* and then maintained for 5 days in normal glucose (NG - 5.5mM), high glucose (HG - 30.5mM) or L-glucose (LG – 30.5mM) osmotic control. The lower images show the red/green ratio in false colour, with a low red-to-green ratio (indicative of younger mitochondria) in blue. Quantification of *pMitoTimer* red-to-green ratio is presented in box-and-whisker plots; n=2 biological replicates and 5 technical replicates per group. One-way ANOVA with Bonferroni's correction for multiple comparisons. CMV, cytomegalovirus promoter; MTS, mitochondrial targeting sequence; MFI, mean fluorescence intensity. Scale bar= 20  $\mu$ m.



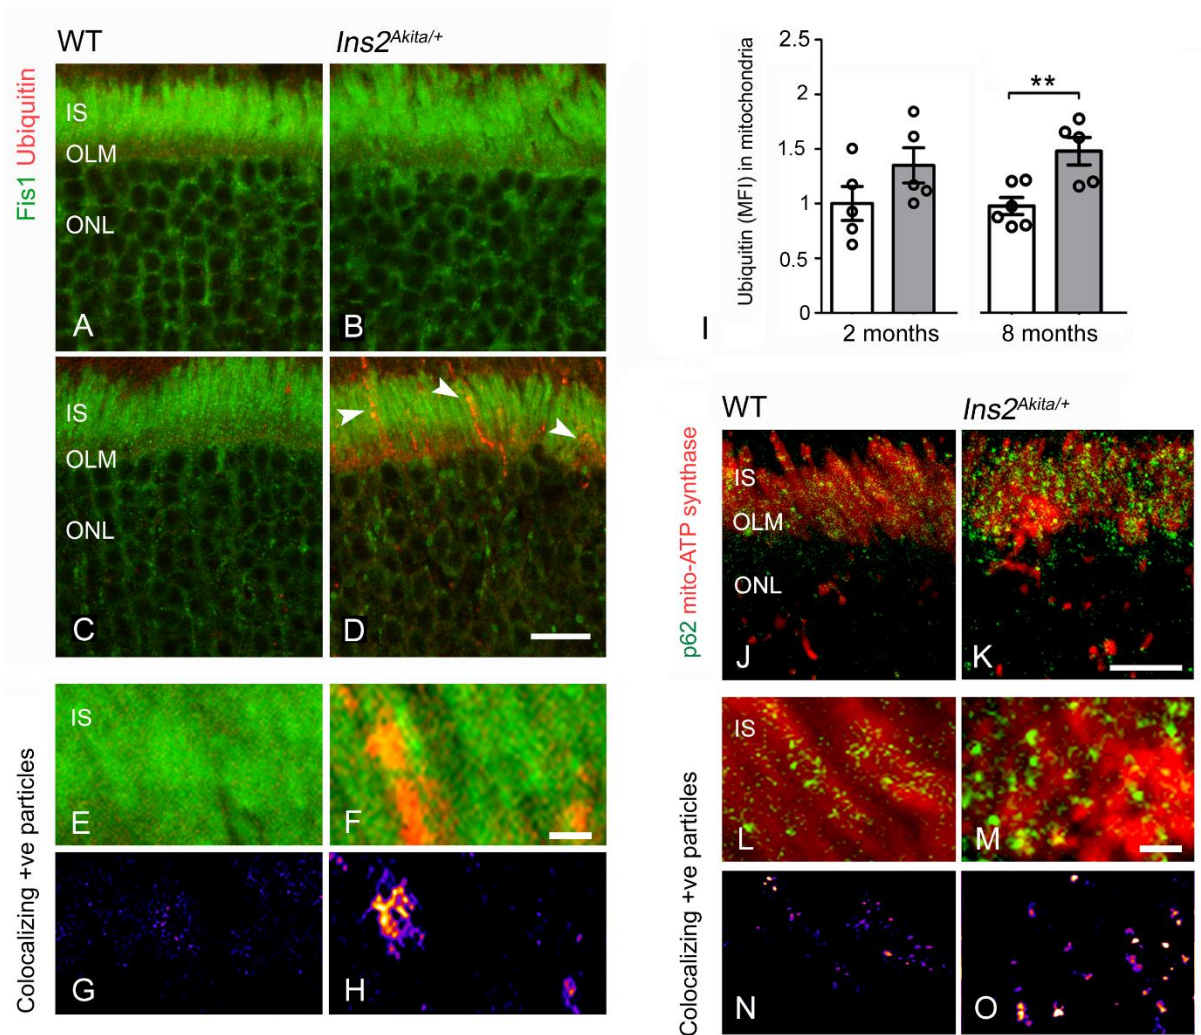

**Supplemental Fig 8. Accumulation of ubiquitin and p62 in mitochondria at the outer retina of 8-month hyperglycaemic *Ins2<sup>Akita/+</sup>* mice.** Retinal micrographs of 2-month (A-B) and 8-month (C-H) hyperglycaemic *Ins2<sup>Akita/+</sup>* and aged-matched WT mice processed for Fis1 and Ubiquitin immunoreactivities. Arrowheads in (D) indicate ubiquitin accumulation in mitochondria of photoreceptor IS. (E-F) High magnification images of Fis1 and Ubiquitin immunoreactivities at the inner segments (IS) of photoreceptors. (G-H) Fis1-Ubiquitin colocalization is shown in false colour (higher values: white-orange, low values: purple-black). (I) The mean fluorescence intensities (MFI) of ubiquitin in the mitochondria of photoreceptor IS of 2-month and 8-month hyperglycaemic *Ins2<sup>Akita/+</sup>* and aged-matched WT mice. (J-K) Retinal micrographs of 8-month hyperglycaemic *Ins2<sup>Akita/+</sup>* and aged-matched WT mice processed for p62 and mitochondrial ATP-synthase immunoreactivities. (L-M) High magnification insets of p62 and mitochondrial ATP-synthase in photoreceptor IS. (N-O) p62 co-localization with mitochondrial ATP-synthase is shown in false colour (higher values: white-orange, low values: purple-black). Keys: WT (white bars), *Ins2<sup>Akita/+</sup>* (grey bars); n=5-6 eyes per strain. Results are presented as mean  $\pm$  SEM (as fold changes compared to age-matched WT mice). \*\* $p < 0.01$ . Two-sided unpaired Student's *t*-test. OLM, outer limiting membrane; ONL, outer nuclear layer. Scale bars = 10  $\mu$ m (D, K), 2  $\mu$ m (F, M).

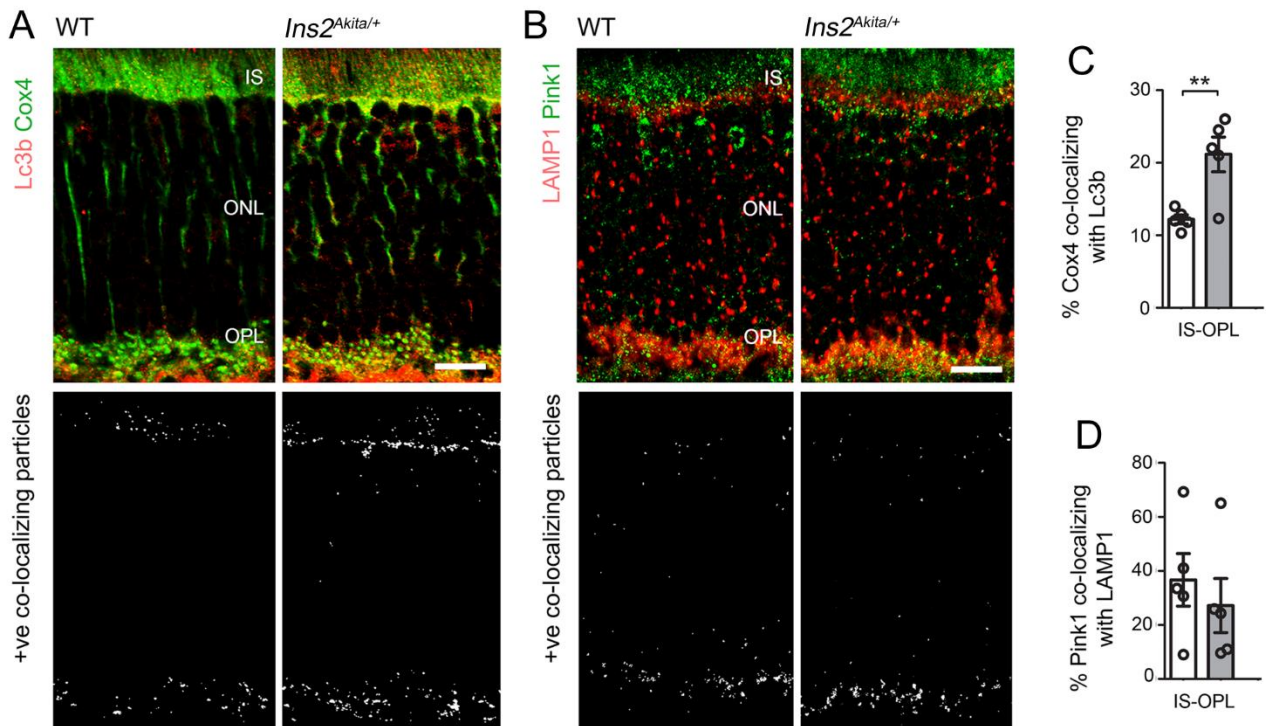

**Supplemental Fig 9. Inefficient mitophagy at the outer retina of 8-month hyperglycaemic *Ins2<sup>Akita/+</sup>* mice.** Representative micrographs and quantification analysis of Lc3b-Cox4 (A, C) and LAMP1-Pink1 (B, D) co-localizing particles at the outer retina (IS-OPL) of 8-month hyperglycaemic *Ins2<sup>Akita/+</sup>* and aged-matched WT mice. Keys: WT (white bars), *Ins2<sup>Akita/+</sup>* (grey bars); n=5 eyes per strain, Results are presented as mean  $\pm$  SEM. \*\* $p < 0.01$ , two-sided unpaired Student's *t*-test. IS, photoreceptor inner segments; ONL, outer nuclear layer; OPL, outer plexiform layer. Scale bars = 20  $\mu$ m (A-B).

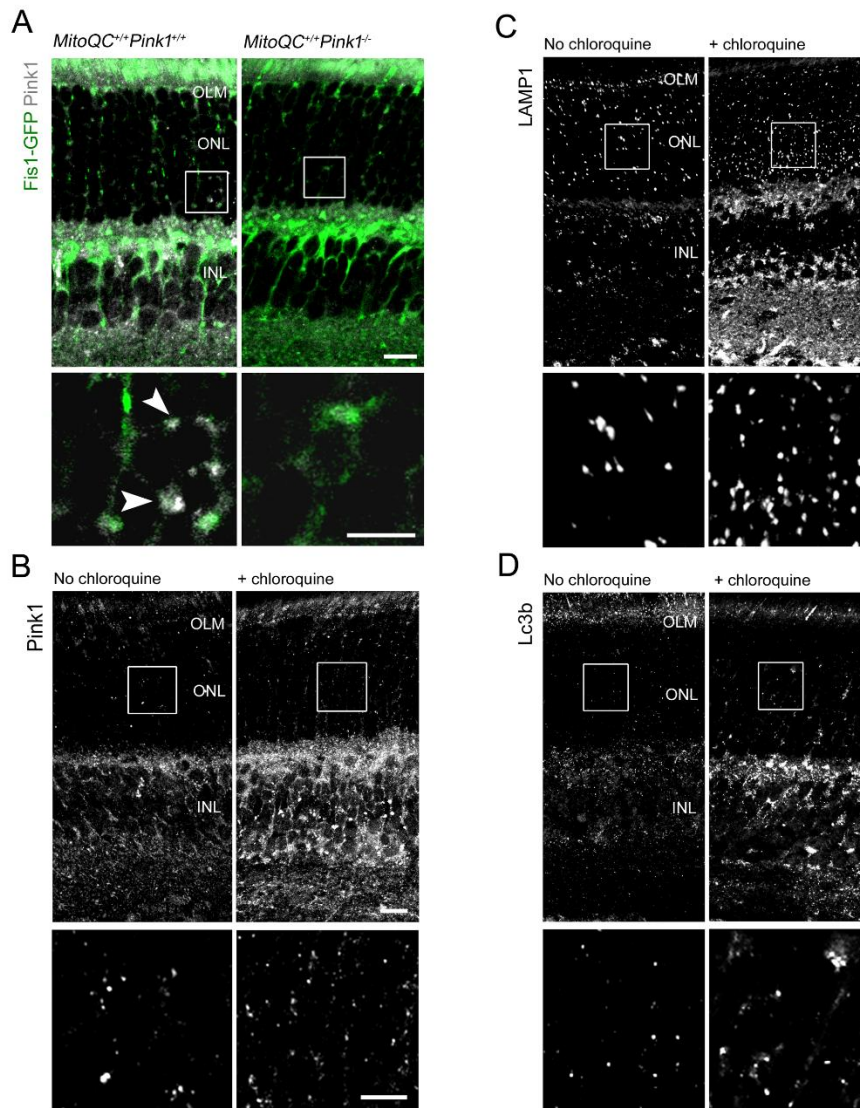

**Supplemental Fig 10. Validation of Pink1, Lc3b and LAMP1 antibodies for immunohistochemical analysis in mouse retinas.** Representative confocal photomicrographs of Pink1 (A, B), LAMP1 (C) and Lc3b (D) immunoreactivities in the retina of (A) *MitoQC*<sup>+/+</sup>*Pink1*<sup>+/+</sup> and *MitoQC*<sup>+/+</sup>*Pink1*<sup>-/-</sup> mice or (B-D) C57BL6/J mice 24h after intravitreal injection of 500  $\mu$ M chloroquine. Enclosed areas indicate high magnification insets (shown below their corresponding panel). (Inset in A) Arrowheads indicate localization of Pink1 immunoreactivity in Fis1-GFP<sup>+</sup> mitochondria. Insets in (B-D) show accumulation of Pink1 (B), LAMP1<sup>+</sup> lysosomes (C) and Lc3b<sup>+</sup> autophagosomes (D) in chloroquine injected eyes as compared to non-chloroquine treated controls. OLM, outer limiting membrane; ONL, outer nuclear layer; INL, inner nuclear layer. Scale bars = 20  $\mu$ m (A, B), 10  $\mu$ m (insets in A-B).

## Supplemental Tables

**Supplemental Table 1.** Mouse primers used for PCR and rtPCR

| <b>Genes</b>       | <b>Forward</b>             | <b>Reverse</b>            |
|--------------------|----------------------------|---------------------------|
| <i>Cox4i1</i>      | TCCCCACTTACGCTGATCG        | GATGCGGTACAACCTGAACTTTCT  |
| <i>Cox4i2</i>      | GTTGACTGCTACGCCCAGCGC      | CCGGTACAAGGCCACCTTCTC     |
| <i>Pink1</i>       | GCTTGCCAATCCCTTCTATG       | CTCTCGCTGGAGCAGTGAC       |
| <i>Park2</i>       | TCAGGTTCAACTCCAGCTATGGC    | TCCCGGCAAAAATCACACGCAGC   |
| <i>Map1lc3b</i>    | TTATAGAGCGATACAAGGGGGAG    | CGCCGTCTGATTATCTTGATGAG   |
| <i>Sqstm1</i>      | GAGGCACCCCGAAACATGG        | ACTTATAGCGAGTTCCCACCA     |
| <i>mMITO</i>       | CTAGAAACCCCGAAACCAA        | CCAGCTATCACCAAGCTCGT      |
| <i>CoII</i>        | ATTGCCCTCCCCTCTCTACGCA     | CGTAGCTTCAGTATCATTGGTGCCC |
| <i>Long mtDNA</i>  | GCCAGCCTGACCCATAGCCATAATAT | GAGAGATTTTATGGGTGTAATGCGG |
| <i>Short mtDNA</i> | CCCAGCTACTACCATCATTCAAGT   | GATGGTTTGGGAGATTGGTTGATGT |
| <i>18s</i>         | AGGGGAGAGCGGGTAAGAGA       | GGACAGGACTAGGCGGAACA      |

**Supplemental Table 2.** Primary antibodies used for western blot (WB), immunohistochemistry (IHC) and immunocytochemistry (IC)

| <b>Antigen</b>      | <b>Antiserum (Host)</b> | <b>Dilution</b>                  | <b>Source (catalog number)</b> |
|---------------------|-------------------------|----------------------------------|--------------------------------|
| ATP Synthase (beta) | mouse                   | 1:150 (IHC)                      | Thermo (A-21351)               |
| $\beta$ -actin      | mouse                   | 1:10000 (WB)                     | Santa Cruz (sc-47778)          |
| BrDU                | mouse                   | 1:50 (IC)                        | Sigma (B8434)                  |
| Cone-arrestin       | rabbit                  | 1:10000 (IHC)                    | Chemicon (ab15282)             |
| Cox4                | goat                    | 1:50 (IHC)                       | R&D systems (AF5814)           |
| Cox4                | mouse                   | 1:200 (IC) - 1:1000 (WB)         | Novus Biol (NBP2-59776)        |
| Fis1                | rabbit                  | 1:500 (IHC)                      | Genetex (GTX111010)            |
| Glutamine synthase  | rabbit                  | 1:1000 (IC)                      | Sigma (G2781)                  |
| Ki67                | rat                     | 1:100 (IC)                       | Thermo (14-5698-82)            |
| Lc3b                | rabbit                  | 1:500 (IHC and IC)               | Cell Signalling (3868)         |
| LAMP1 (CD107a)      | rat                     | 1:200 (IHC)                      | BioRad (MCA4707T)              |
| PARL                | rabbit                  | 1:1000 (WB)                      | Abcam (ab45231)                |
| Parkin              | mouse                   | 1:1000 (WB)                      | Abcam (ab77924)                |
| PGC-1 $\alpha$      | rabbit                  | 1:5000 (WB) - 1:500 (IHC and IC) | Novus Biol (NBP1-04676)        |
| Pink1               | rabbit                  | 1:2000 (WB) - 1:200 (IHC)        | Abcam (ab23707)                |
| p62/SQTSM1          | rabbit                  | 1:200 (IHC)                      | Abcam (ab91526)                |
| TFAM                | Rabbit                  | 1:1000 (WB) - 1:500 (IHC)        | Genetex (GTX112760)            |
| TOMM20              | rabbit                  | 1:500 (IHC)                      | Sigma (HPA011562)              |
| Ubiquitin           | mouse                   | 1:1000 (IHC)                     | Novus Biol (NB300-130)         |
